# Supplementary material
Source: publisher figshare collection journal article supplement (https://sage.figshare.com/ndownloader/files/17822966)

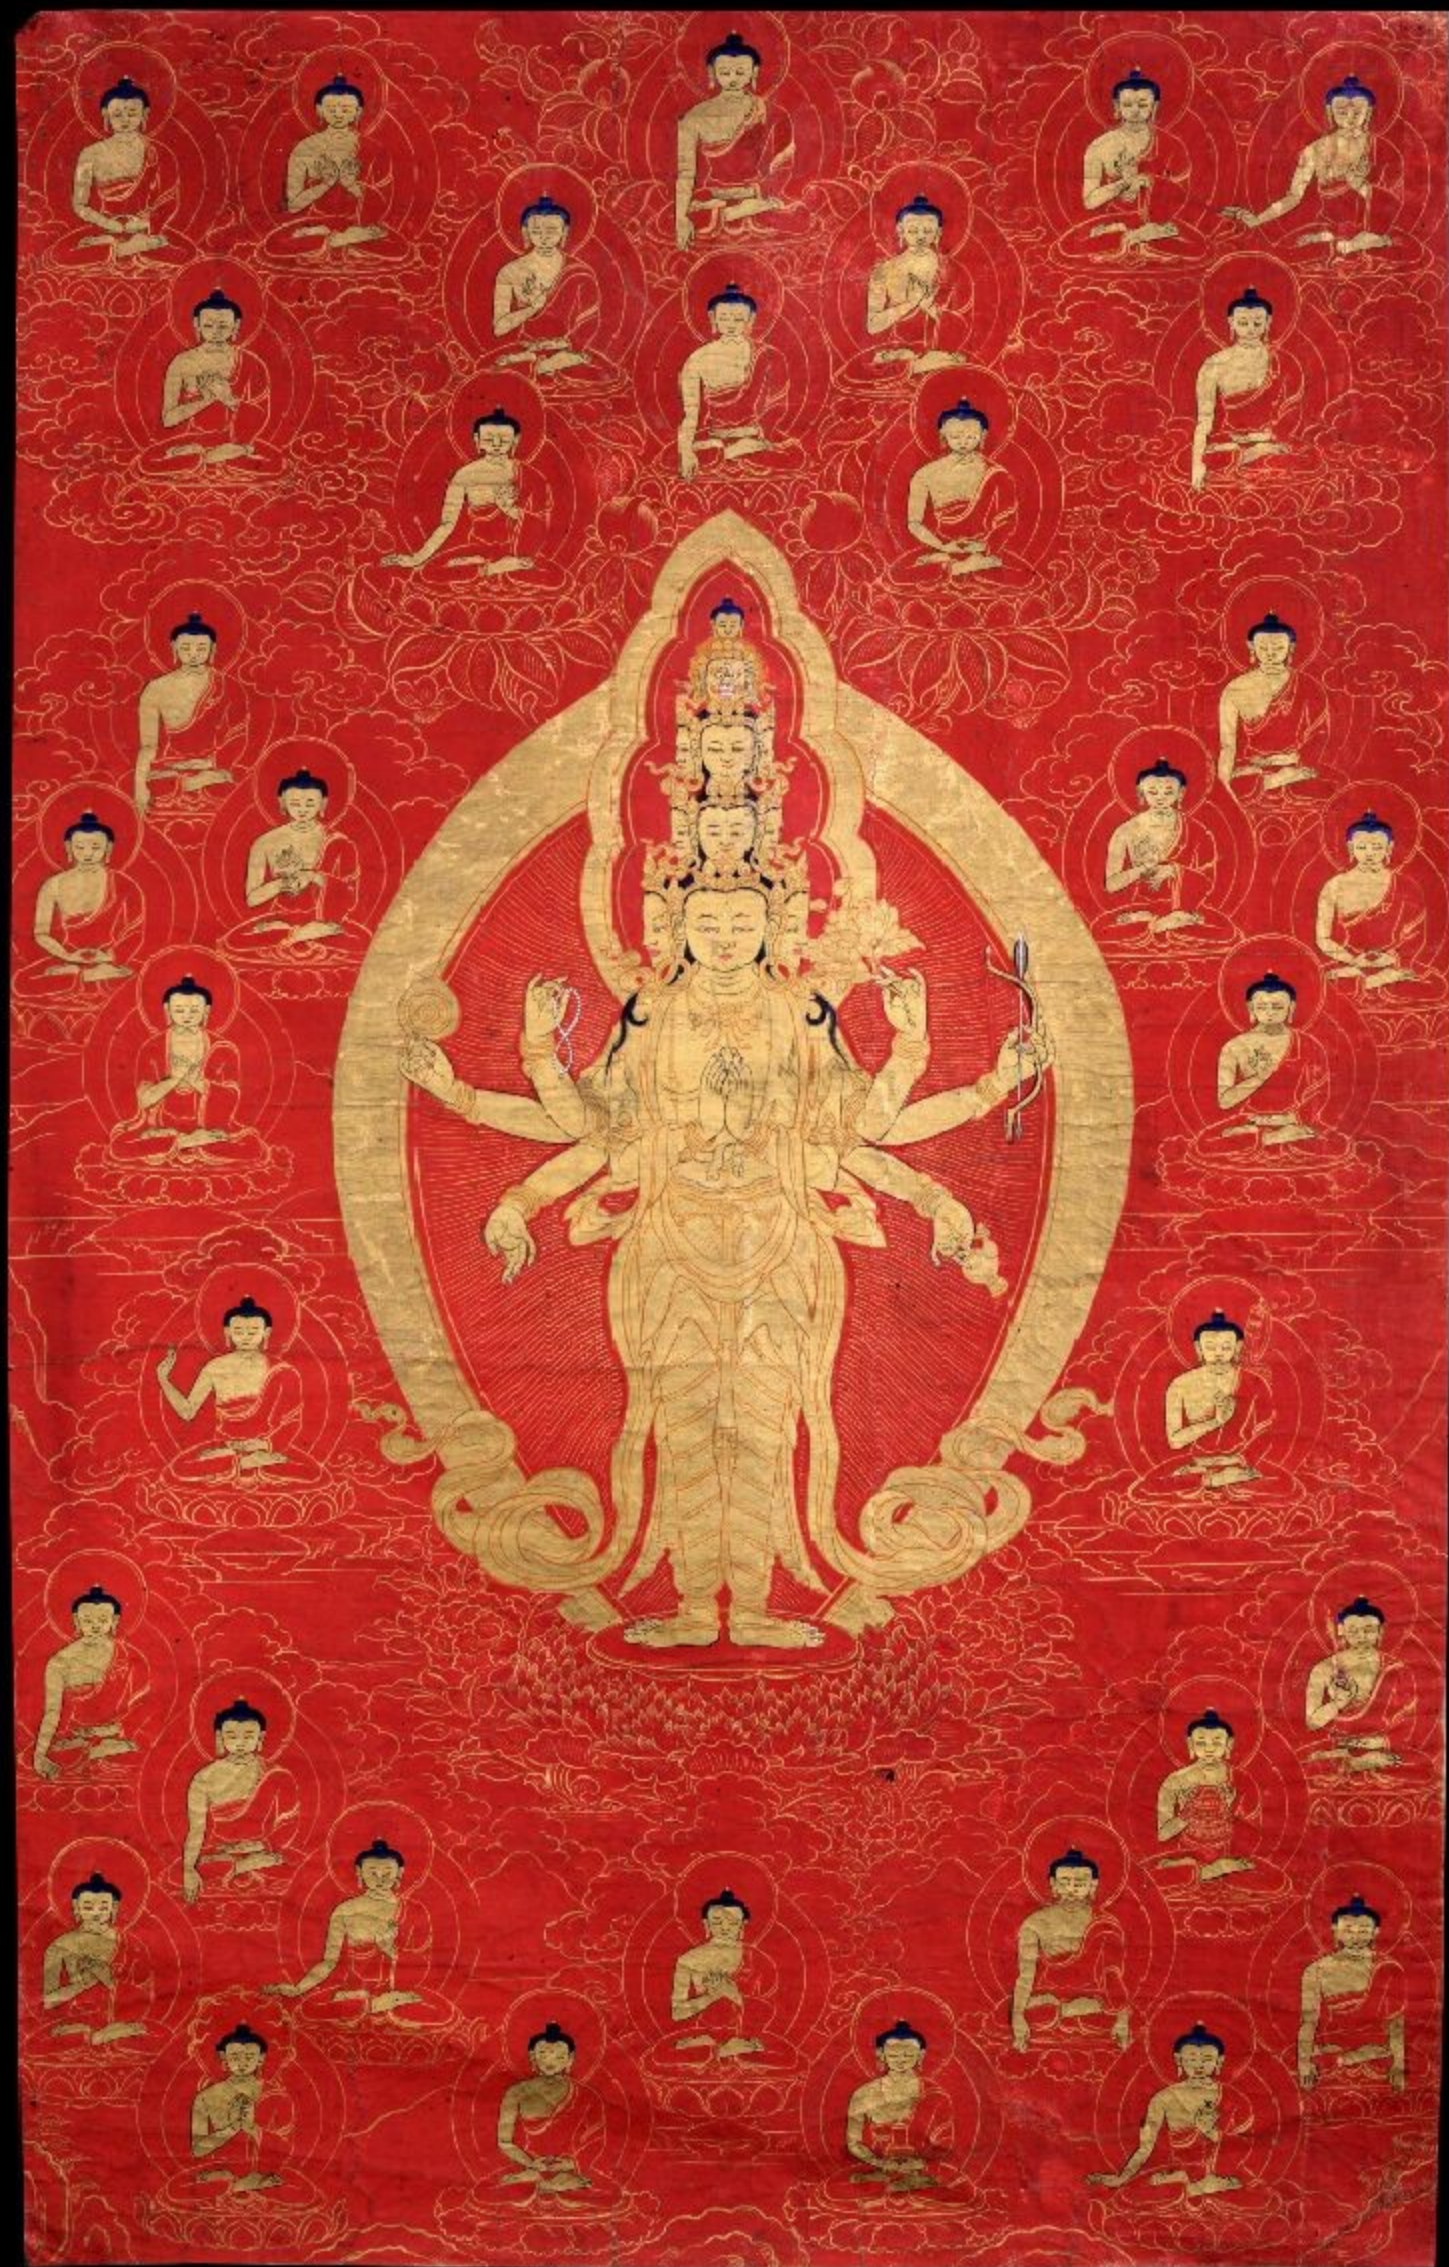

Supplement: Supplementary file 1 [file 17822966]
